# Supplementary material for: Exposure to low-dose radiation in occupational settings and ischaemic heart disease: a systematic review and meta-analysis
Source: HighWire-hosted journal article supplement (doi:10.1136/oemed-2023-108865), 2023-10-19

## Exposure to low-dose radiation in occupational settings and ischemic heart disease: a systematic review and meta-analysis

### Supplementary material

#### Search Strategy

Limits: 1990-2022; English; search done on October 20, 2022

#### PubMed:

(((((ionizing[Text Word] OR ((low [Text Word] OR moderate\*[Text Word]) AND (dose[Text Word] OR dosage[Text Word]))) AND radiation[Text Word])) OR (Alpha particles[Text Word] OR beta particles[Text Word] OR gamma rays[Text Word] OR gamma radiation[Text Word] OR x-rays[Text Word] OR radon[Text Word])) AND ((occupation\*[Text Word] OR employ\*[Text Word] OR job[Text Word] OR vocation\*[Text Word])) AND (myocardial infarction[Text Word] OR angina[Text Word] OR ((heart[Text Word] OR aortic[Text Word] OR aorta[Text Word] OR cardiac[Text Word] OR cardiomyopath\*[Text Word] OR myocardial[Text Word] OR coronary[Text Word]) AND (disease\*[Text Word] OR aneurysm[Text Word] OR occlusion[Text Word] OR stenosis[Text Word] OR thrombosis[Text Word] OR vasospasm[Text Word])) OR (cardiovascular disease[Text Word] OR CVD[Text Word] OR (ischemic [Text Word]) OR (stroke [Text Word]))))

#### Scopus:

TITLE-ABS-KEY ( "myocardial infarction" OR angina OR ( ( heart OR aortic OR aorta OR cardiac OR cardiomyopath\* OR myocardial OR coronary OR cardiovascular OR cvd OR ischemic OR stroke ) AND ( disease\* OR aneurysm OR occlusion OR stenosis OR thrombosis OR vasospasm ) ) ) AND TITLE-ABS-KEY ( occupation\* ) OR TITLE-ABS-KEY ( employ\* ) OR

TITLE-ABS-KEY ( job\* ) OR TITLE-ABS-KEY ( vocation\* ) AND TITLE-ABS-KEY ( ( ( ionizing OR ionising OR ( low OR moderate ) AND ( dose OR dosage ) ) ) AND radiation ) OR "Alpha particles" OR "beta particles" OR "gamma rays" OR "gamma radiation" OR x-rays OR radon)

**Web of Science:**

TS= ( ( "myocardial infarction" OR angina OR ( ( heart OR aortic OR aorta OR cardiac OR cardiomyopath\* OR myocardial OR coronary OR cardiovascular disease OR CVD OR ischemic OR stroke ) AND ( disease\* OR aneurysm OR occlusion OR stenosis OR thrombosis OR vasospasm ) ) ) AND ((occupation\*) OR ( employ\* ) OR ( job\* ) OR ( vocation\* ) ) AND ( ( ( ionizing OR ( low OR moderate ) AND ( dose OR dosage ) ) ) AND radiation ) OR "Alpha particles" OR "beta particles" OR "gamma rays" OR "gamma radiation" OR x-rays OR “radon” ) )

**Table S1. Characteristics of included studies**

| Study ID           | Study design | Population                              | Country | Time period of exposure | Follow-up       | Size of cohort | Exposure(s) type and organ                                                                                                                        | Mean (range) exposure dose (Sv/Gy)      | Measures of association                    | Outcome(s)                                                                                              |
|--------------------|--------------|-----------------------------------------|---------|-------------------------|-----------------|----------------|---------------------------------------------------------------------------------------------------------------------------------------------------|-----------------------------------------|--------------------------------------------|---------------------------------------------------------------------------------------------------------|
| Anderson 2021 (36) | Cohort       | Uranium enrichment workers              | US      | 1948 - 2003             | To 2011         | 23,731         | Internal dose to the lung (mGy); External dose to the lung (mGy)                                                                                  | 0.044 (0 to 0.592)                      | RR, ERR/mGy                                | IHD, cerebrovascular disease (mortality)                                                                |
| Atkinson 2004 (46) | Cohort       | Atomic Energy Authority workers         | UK      | 1946 - 1995             | To 1997         | 51,367         | External whole body dose (including neutrons and tritium where relevant) (mSv)                                                                    | 0.01888 (<0.01 to >0.2)                 | SMR, RR                                    | IHD (mortality)                                                                                         |
| Azizova 2015 (34)  | Cohort       | Mayak nuclear                           | Russia  | 1948-1982               | To 2008         | 22,377         | External whole body gamma dose and external dose to the liver from alpha radiation (Gy)                                                           | 0.51 (0 to >4.5)<br>0.43 (<0.1 to >3.0) | RR                                         | IHD (incidence)                                                                                         |
| Azizova 2018 (31)  | Cohort       | Mayak nuclear workers                   | Russia  | 1948-1982               | To 2008 (Mayak) | 22,374 (Mayak) | External whole body gamma dose (Sv), internal alpha dose to the liver from plutonium (Gy)                                                         | 0.52 (0 to 84)                          | RR, ERR/Sv, ERR/Gy                         | Circulatory disease, IHD, cerebrovascular disease (mortality)                                           |
| Azizova 2022 (30)  | Cohort       | Mayak nuclear                           | Russia  | 1948-1982               | To 2018         | 22,377         | External dose (Gy) to the liver, internal dose to the liver from alpha radiation (Gy) and internal alpha dose from internal exposure to plutonium | 0.43 (<0.1 to >3.0)                     | RR, EER/Gy                                 | Circulatory disease, including IHD and cerebrovascular disease mortality                                |
| Boice 2022a (37)   | Cohort       | Los Alamos laboratory (nuclear weapons) | US      | 1943-1980               | To 2017         | 26,328         | External and internal whole body dose and specific dose to 14 organs including heart.                                                             | 0.0135 (0 to 0.897) (Heart)             | SMR, ERR/Gy, HR                            | All heart disease, IHD, cerebrovascular disease (mortality)                                             |
| Boice 2022b (38)   | Cohort       | Medical radiation workers               | US      | 1965-1994               | To 2016         | 109,019        | External dose from x- and gamma radiation (mGy); whole body and organ-specific for lung, red bone marrow, and heart                               | 0.0146 (0 to 1.27) (Heart)              | SMR, EER/100mGy by radiation dose to heart | All heart disease, ischemic heart disease, rheumatic heart disease, cerebrovascular disease (mortality) |
| Boice 2022c (39)   | Cohort       | Nuclear power plant workers             | US      | 1957-1984               | To 2011         | 135,193        | External dose from gamma radiation (mGy); whole body and organ-specific for lung, esophagus, colon, brain, bone marrow, and heart.                | 0.0439 (0 to 1.1) (Heart)               | SMR, EER/100mGy by radiation dose to heart | All heart disease, ischemic heart disease, cerebrovascular disease (mortality)                          |
| Bouet 2018 (16)    | Cohort       | Uranium millers                         | France  | 1968-2013               | To 2013         | 1,291          | No dosimetry reported.                                                                                                                            |                                         | SMR                                        | IHD, cerebrovascular disease (mortality)                                                                |

| Study ID               | Study design | Population                        | Country        | Time period of exposure           | Follow-up                         | Size of cohort | Exposure(s) type and organ                                                                                                     | Mean (range) exposure dose (Sv/Gy) | Measures of association                  | Outcome(s)                                                                                                                                         |
|------------------------|--------------|-----------------------------------|----------------|-----------------------------------|-----------------------------------|----------------|--------------------------------------------------------------------------------------------------------------------------------|------------------------------------|------------------------------------------|----------------------------------------------------------------------------------------------------------------------------------------------------|
| Cha 2020 (20)          | Cohort       | Medical diagnostics               | South Korea    | 2007 - 2016                       | To 2016                           | 11,500         | Internal dose to the heart (mGy)                                                                                               | 0.0062 (0.000 0 to 0.0729)         | RR, ERR/100 mGy                          | Circulatory disease (all), circulatory disease (except cerebrovascular and others), hypertension, IHD, cerebrovascular disease, others (incidence) |
| Doody 2000 (42)        | Cohort       | Radiological technologists (nuns) | US             | 1926 – unclear                    | To 1995                           | 1,103          | No dosimetry reported.                                                                                                         |                                    | SMR                                      | Circulatory disease (all), IHD, cerebrovascular disease (mortality)                                                                                |
| Gillies 2017 (6)       | Cohort       | Nuclear workers (INWORKS)         | France, UK, US | As early as 1944, as late as 2005 | To 2004, 2001, 2005, respectively | 308,297        | External whole body dose (mSv)                                                                                                 | 0.0252 (0 to 1.932)                | ERR/Sv                                   | Circulatory disease, IHD, cerebrovascular disease (mortality)                                                                                      |
| Golden 2022 (40)       | Cohort       | Uranium processing (Mallinckrodt) | US             | 1942 – 1966                       | To 2012                           | 2,514          | External and internal dose for uranium and radium (mGy) for lung, brain, heart, kidney, colon, red bone marrow and lymph nodes | 0.0475 (0 to 0.738) (Heart)        | SMR, HR, ERR and HR at 100 mGy           | All heart disease, cerebrovascular disease, IHD (mortality)                                                                                        |
| Kreuzer 2013 (47)      | Cohort       | Wismut uranium miners & millers   | Germany        | 1946 – 1989                       | To 2008                           | 58,982         | External whole body dose from gamma radiation (mSv)                                                                            | 0.0407 (0 to 0.909)                | RR, ERR/Sv                               | All cardiovascular disease, IHD, AMI, cerebrovascular diseases (mortality)                                                                         |
| Kreuzer 2015 (43)      | Cohort       | Wismut uranium millers            | Germany        | 1946 – 1990                       | To 2008                           | 4,054          | External dose (Sv), long-lived radionuclides, Radon (WLM)                                                                      | 0.0407 (0 to 0.909)                | SMR, ERR/100WLM, ERR/Sv, ERR/100kBq/h/m3 | All cardiovascular disease, IHD, cerebrovascular disease (mortality)                                                                               |
| Lane 2010 (44)         | Cohort       | Eldorado Uranium workers          | Canada         | 1932-1980                         | To 1999                           | 17,660         | External gamma dose and Radon Decay Products (WLM)                                                                             | 0.0522 males, 0.0344 females.      | SMR, SIR, ERR/100WLM                     | IHD, Stroke, and other cardiovascular diseases (mortality)                                                                                         |
| Metz-Flamant 2013 (48) | Cohort       | Nuclear workers                   | France         | 1950 – 1994                       | To 2004                           | 59,021         | External whole body from x- and gamma radiation dose (mSv)                                                                     | 0.0225 (0 to 0.6056)               | ERR/Sv                                   | All circulatory diseases, IHD, cerebrovascular diseases, other circulatory diseases (mortality)                                                    |

| Study ID              | Study design | Population                               | Country        | Time period of exposure             | Follow-up                           | Size of cohort | Exposure(s) type and organ                                                       | Mean (range) exposure dose (Sv/Gy)       | Measures of association   | Outcome(s)                                                                                                       |
|-----------------------|--------------|------------------------------------------|----------------|-------------------------------------|-------------------------------------|----------------|----------------------------------------------------------------------------------|------------------------------------------|---------------------------|------------------------------------------------------------------------------------------------------------------|
| Navaranjan 2016 (15)  | Cohort       | Uranium miners & millers                 | Canada         | 1954 – 1996                         | To 2007                             | 28,546         | Cumulative exposure to radon decay products (WLM)                                | 21.0 WLM for males, 0.2 WLM for females. | SMR, ERR/100WLM           | All circulatory disease, Major cardiovascular disease, IHD, cerebrovascular disease (mortality)                  |
| Rage 2018 (17)        | Cohort       | Uranium miners (adding Jouac)            | France         | 1957 – 2001                         | To 2007                             | 5,400          | External dose from gamma rays (mGy), radon (WLM), and uranium ore dust (kBqm-3h) | 0.0218 (0.0001 to 0.0995)                | SMR, ERR/100WLM           | All circulatory system diseases, IHD, cerebrovascular disease, other circulatory diseases (mortality)            |
| Rajaraman 2016 (55)   | Cohort       | Radiological technologists (fluoroscopy) | US             | 1950 – 2008                         | To 2008                             | 68,926         | No dosimetry reported.                                                           |                                          | HR                        | All heart diseases, IHD, myocardial infarction, hypertension (mortality)                                         |
| Villeneuve 2007a (56) | Cohort       | Fluorspar miners                         | Canada         | 1950 - 1990                         | To 2001                             | 1,742          | Radon (WLM)                                                                      | 43.6 WLM/year (0 to >2,000)              | RR                        | IHD (called coronary heart disease in this paper), circulatory disease, cerebrovascular disease, AMI (mortality) |
| Villeneuve 2007b (45) | Cohort       | Fluorspar miners                         | Canada         | 1950 - 1990                         | To 2001                             | 1,742          | Radon (WLM)                                                                      | 43.6 WLM/year (0 to >2,000)              | SMR                       | Circulatory diseases, coronary heart disease, cerebrovascular disease (mortality)                                |
| Vrijheid 2007 (41)    | Cohort       | Nuclear power                            | 15 countries * | As early as 1943 to as late as 2000 | As early as 1984 to as late as 2000 | 275,312        | External dose to colon or lung (Sv)                                              | 0.0207 (0.0 to >0.5) (colon)             | SMR, ERR/Sv, RR at 100mSv | IHD, heart failure, DVT, cerebrovascular diseases, other circulatory diseases (mortality)                        |
| Wang 2009 (21)        | Cohort       | Medical diagnostics                      | China          | 1950-1980                           | To 1995                             | 27,011         | External whole body dose from X-rays (mGy)                                       | 0.189 (0 to 0.673)                       | RR                        | Circulatory disease, IHD, cerebrovascular disease (mortality)                                                    |

| Study ID            | Study design | Population                 | Country | Time period of exposure | Follow-up | Size of cohort | Exposure(s) type and organ                                           | Mean (range) exposure dose (Sv/Gy)            | Measures of association | Outcome(s)                                                                              |
|---------------------|--------------|----------------------------|---------|-------------------------|-----------|----------------|----------------------------------------------------------------------|-----------------------------------------------|-------------------------|-----------------------------------------------------------------------------------------|
| Zablotska 2013 (35) | Cohort       | Uranium processing workers | Canada  | 1932-1980               | To 1999   | 3,000          | External whole body gamma radiation dose (mSv), radon exposure (WLM) | 0.1344 (0 to 5.0988).<br>15.9 WLM (0.0-627.6) | SMR, RR, ERR/Sv         | Hypertensive disease, IHD, cerebrovascular disease, other CVD (mortality and incidence) |
| Zhang 2019 (49)     | Cohort       | Radiation workers          | UK      | 1955-2011               | To 2011)  | 174,541        | External whole body dose (mSv)                                       | 0.0232 (0 to >0.5)                            | mSv dose, ERR/Sv        | Heart diseases (mortality)                                                              |

\* Australia, Belgium, Canada, Finland, France, Hungary, S. Korea, Lithuania, Slovakia, Spain, Sweden, UK, US, Switzerland

**Figure S1. Details of the OHAT Risk of Bias assessment by study**

|                   | Selection | Confounding | Attrition/e | Detection | Outcome | Selective repor | Other (statistic | Any other | Summary score |
|-------------------|-----------|-------------|-------------|-----------|---------|-----------------|------------------|-----------|---------------|
| Anderson 2021     | +         | -           | ++          | -         | ++      | ++              | ++               | ++        | Tier 2        |
| Atkinson 2004     | +         | -           | +           | +         | ++      | ++              | ++               | ++        | Tier 2        |
| Azizova 2018      | ++        | -           | +           | +         | +       | ++              | ++               | ++        | Tier 2        |
| Azizova 2015b     | ++        | +           | +           | +         | ++      | ++              | ++               | ++        | Tier 1        |
| Azizova 2022a     | +         | -           | -           | -         | +       | ++              | +                | ++        | Tier 2        |
| Boice 2022a       | -         | -           | ++          | ++        | ++      | ++              | ++               | ++        | Tier 2        |
| Boice 2022b       | +         | -           | -           | -         | +       | +               | +                | ++        | Tier 2        |
| Boice 2022c       | +         | -           | +           | -         | +       | +               | +                | ++        | Tier 2        |
| Bouet 2018        | -         | -           | ++          | -         | ++      | ++              | ++               | ++        | Tier 2        |
| Cha 2020          | +         | ++          | ++          | -         | +       | ++              | ++               | ++        | Tier 2        |
| Doody 2000        | -         | -           | ++          | --        | ++      | +               | ++               | ++        | Tier 2        |
| Gillies 2017      | +         | -           | -           | -         | ++      | ++              | ++               | ++        | Tier 2        |
| Golden 2022       | -         | -           | +           | -         | ++      | ++              | ++               | ++        | Tier 2        |
| Kreuzer 2013      | +         | -           | ++          | -         | +       | ++              | ++               | ++        | Tier 2        |
| Kreuzer 2015      | +         | -           | ++          | -         | +       | +               | ++               | ++        | Tier 2        |
| Lane 2010         | +         | +           | -           | --        | +       | ++              | +                | ++        | Tier 2        |
| Metz-Flamant 2013 | +         | -           | ++          | +         | +       | ++              | ++               | ++        | Tier 2        |
| Navaranjan 2016   | -         | --          | +           | +         | ++      | +               | ++               | ++        | Tier 2        |
| Rage 2018         | -         | -           | ++          | -         | ++      | ++              | ++               | ++        | Tier 2        |
| Rajaraman 2016    | -         | +           | -           | --        | -       | +               | ++               | ++        | Tier 2        |
| Villeneuve 2007   | +         | +           | +           | +         | ++      | ++              | ++               | ++        | Tier 1        |
| Villeneuve 2007b  | +         | -           | ++          | --        | +       | ++              | +                | ++        | Tier 2        |
| Vrijheid 2007     | +         | -           | +           | -         | +       | ++              | ++               | ++        | Tier 2        |
| Wang 2009         | +         | -           | +           | -         | +       | ++              | ++               | ++        | Tier 2        |
| Zablotska 2013    | -         | -           | -           | -         | +       | +               | ++               | ++        | Tier 2        |
| Zhang 2019        | +         | -           | +           | +         | ++      | ++              | ++               | ++        | Tier 2        |

**Figure S2. Funnels plots for studies assessing the association between ischemic heart disease mortality and low dose occupational radiation exposure**

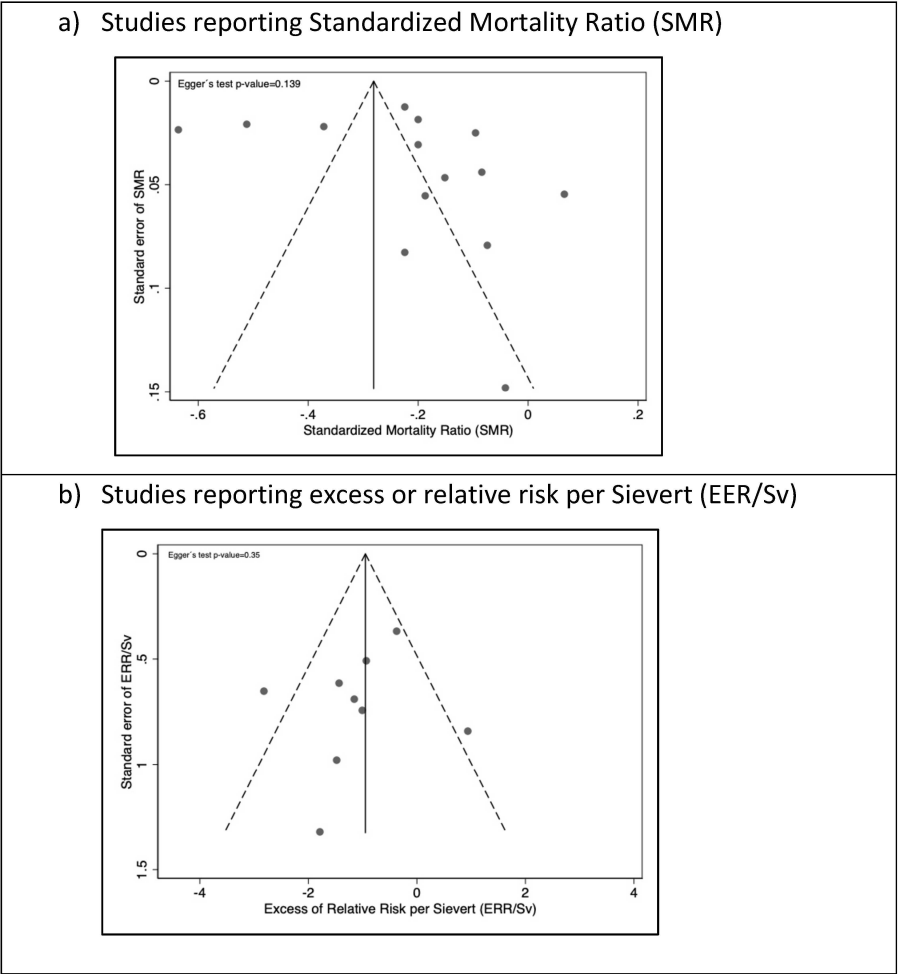

Supplement: oemed-2023-108865supp001_data_supplement.pdf [file oemed-2023-108865supp001_data_supplement.pdf]
